# Supplementary material for: Equity impact of participatory learning and action community mobilisation and mHealth interventions to prevent and control type 2 diabetes and intermediate hyperglycaemia in rural Bangladesh: analysis of a cluster randomised controlled trial
Source: PubMed Central journal article supplement (PMC9118071; doi:10.1136/jech-2021-217293), 2022-03-11
Supplement: jech-2021-217293supp001.pdf [file jech-2021-217293supp001.pdf]

## Supplementary Material

## S1: Sociodemographic characteristics of the DMagic participants at baseline (pre-intervention)

|                                                                   |                            | Control      | mHealth       | PLA          |
|-------------------------------------------------------------------|----------------------------|--------------|---------------|--------------|
| <b>Cluster Level</b>                                              |                            |              |               |              |
| <b>Villages (clusters)</b>                                        |                            | 32           | 32            | 32           |
| <b>Mean village population aged ≥30 years (SD)</b>                |                            | 521 (189)    | 551 (152)     | 548 (225)    |
| <b>Mean number of households (SD)</b>                             |                            | 269 (97)     | 282 (79)      | 285 (112)    |
| <b>Individual Level</b>                                           |                            |              |               |              |
| <b>Total participants who completed the survey</b>                |                            | 4048         | 4071          | 4021         |
| <b>Age, Years</b>                                                 | 30-39                      | 13 (34.4%)   | 132 (32.7%)   | 138 (34.5%)  |
|                                                                   | 40-49                      | 991 (24.5%)  | 1068 (26.2%)  | 992 (24.7%)  |
|                                                                   | 50-59                      | 767 (19.0%)  | 765 (18.8%)   | 761 (18.9%)  |
|                                                                   | 60-100                     | 899 (22.2%)  | 909 (22.3%)   | 880 (21.9%)  |
| <b>Gender</b>                                                     | Male                       | 1950 (48.2%) | 1845 (45.3%)  | 1889 (47.0%) |
|                                                                   | Female                     | 2098 (51.8%) | 2226 (54.7%)  | 2132 (53.0%) |
| <b>Education</b>                                                  | None                       | 2116 (52.3%) | 1950 (47.9%)  | 1905 (47.4%) |
|                                                                   | Primary                    | 921 (22.8%)  | 852 (20.9%)   | 1004 (25.0%) |
|                                                                   | Secondary                  | 989 (24.4%)  | 1231 (30.2%)  | 1086 (27.0%) |
|                                                                   | Tertiary                   | 22 (0.5%)    | 38 (0.9%)     | 26 (0.7%)    |
| <b>Literacy</b>                                                   | Literate                   | 1455 (35.9%) | 1649 (40.5%)  | 1561 (38.8%) |
|                                                                   | Illiterate                 | 2593 (64.1%) | 2422 (59.5%)  | 2460 (61.2%) |
| <b>Marital Status</b>                                             | Not married                | 520 (12.9%)  | 497 (12.2%)   | 491 (12.2%)  |
|                                                                   | Married                    | 3528 (87.2%) | 3,574 (87.8%) | 3530 (87.8%) |
| <b>Religion</b>                                                   | Muslim                     | 3660 (90.4%) | 3674 (90.3%)  | 3666 (91.2%) |
|                                                                   | Other                      | 388 (9.6%)   | 397 (9.8%)    | 355 (8.8%)   |
| <b>Occupation</b>                                                 | Not working                | 2216 (54.8%) | 2323 (57.1%)  | 2164 (53.8%) |
|                                                                   | Manual Labour              | 1362 (33.7%) | 1296 (31.8%)  | 1376 (34.2%) |
|                                                                   | Non-manual labour          | 468 (11.6%)  | 452 (11.1%)   | 481 (12.0%)  |
| <b>Wealth Tertile</b>                                             | Most Poor                  | 1401 (34.6%) | 1523 (37.4%)  | 1124 (28.0%) |
|                                                                   | Poor                       | 1354 (33.5%) | 1351 (33.2%)  | 1392 (34.6%) |
|                                                                   | Least Poor                 | 1293 (31.9%) | 1197 (29.4%)  | 1505 (37.4%) |
| <b>Total participants with baseline data for glycaemic status</b> |                            | 4070         | 4063          | 4054         |
| <b>Glycaemic status</b>                                           | Normal                     | 2860 (70.3%) | 2816 (69.3%)  | 2801 (69.1%) |
|                                                                   | Impaired Fasting Glucose   | 200 (4.9%)   | 186 (4.6%)    | 203 (5.0%)   |
|                                                                   | Impaired Glucose Tolerance | 632 (14.7%)  | 655 (16.1%)   | 594 (14.7%)  |
|                                                                   | Diabetes                   | 378 (9.3%)   | 406 (10.0%)   | 456 (11.3%)  |

**S2: Sociodemographic and diabetic parameters among individuals exposed and not exposed to the DMagic mHealth intervention where exposure is defined as a person having ever received an mHealth message.**

|                                      |                     | Overall           |                          |         | Men               |                         |         | Women             |                         |         |
|--------------------------------------|---------------------|-------------------|--------------------------|---------|-------------------|-------------------------|---------|-------------------|-------------------------|---------|
|                                      |                     | Exposed<br>n=2287 | Not<br>exposed<br>n=1470 | p-value | Exposed<br>n=1184 | Not<br>exposed<br>n=537 | p-value | Exposed<br>n=1103 | Not<br>exposed<br>n=933 | p-value |
| <b>Gender</b>                        | male                | 1184<br>(51.8%)   | 537<br>(36.5%)           | <0.001  |                   |                         |         |                   |                         |         |
|                                      | female              | 1103<br>(48.2%)   | 933<br>(63.5%)           |         |                   |                         |         |                   |                         |         |
| <b>Age (years)</b>                   | 30-39               | 820<br>(35.9%)    | 325<br>(22.1%)           | <0.001  | 395<br>(33.4%)    | 97<br>(18.1%)           | <0.001  | 425<br>(38.5%)    | 228<br>(24.4%)          | <0.001  |
|                                      | 40-49               | 655<br>(28.6%)    | 350<br>(23.8%)           |         | 334<br>(28.2%)    | 121<br>(22.5%)          |         | 321<br>(29.1%)    | 229<br>(24.5%)          |         |
|                                      | 50-59               | 438<br>(19.2%)    | 351<br>(23.9%)           |         | 229<br>(19.3%)    | 118<br>(22.0%)          |         | 209<br>(19.0%)    | 233<br>(25.0%)          |         |
|                                      | ≥60                 | 374<br>(16.4%)    | 444<br>(30.2%)           |         | 226<br>(19.1%)    | 201<br>(37.4%)          |         | 148<br>(13.4%)    | 243<br>(26.1%)          |         |
| <b>Religion</b>                      | Muslim              | 2035<br>(89.0%)   | 1311<br>(89.2%)          | 0.846   | 1034<br>(87.3%)   | 482<br>(89.8%)          | 0.150   | 1001<br>(88.9%)   | 829<br>(88.9%)          | 0.157   |
|                                      | Hindu               | 252<br>(11.0%)    | 159<br>(10.8%)           |         | 150<br>(12.7%)    | 55<br>(10.2%)           |         | 102<br>(9.3%)     | 104<br>(11.2%)          |         |
| <b>Marital Status</b>                | Currently unmarried | 174<br>(7.6%)     | 264<br>(18.0%)           | p<0.001 | 24<br>(2.0%)      | 25<br>(4.7%)            | 0.002   | 150<br>(13.6%)    | 239<br>(25.6%)          | <0.001  |
|                                      | Currently married   | 2113<br>(92.4%)   | 1206<br>(82.0%)          |         | 1160<br>(98.0%)   | 512<br>(95.3%)          |         | 953<br>(86.4%)    | 694<br>(74.4%)          |         |
| <b>Education</b>                     | None                | 1401<br>(61.3%)   | 1152<br>(78.4%)          | <0.001  | 689<br>(58.2%)    | 395<br>(73.6%)          | <0.001* | 749<br>(64.6%)    | 757<br>(81.1%)          | <0.001* |
|                                      | Primary             | 675<br>(29.5%)    | 266<br>(18.1%)           |         | 346<br>(29.2%)    | 108<br>(20.1%)          |         | 329<br>(29.8%)    | 158<br>(16.9%)          |         |
|                                      | Secondary           | 173<br>(7.6%)     | 40<br>(2.7%)             |         | 120<br>(10.1%)    | 25<br>(4.7%)            |         | 53<br>(4.8%)      | 15<br>(1.6%)            |         |
|                                      | Tertiary            | 38<br>(1.7%)      | 12<br>(0.8%)             |         | 29<br>(2.5%)      | 9<br>(1.7%)             |         | 9<br>(0.8%)       | 3<br>(0.3%)             |         |
| <b>Occupation</b>                    | Not working         | 1160<br>(50.7%)   | 1013<br>(68.9%)          | <0.001  | 90<br>(7.6%)      | 96<br>(17.9%)           | <0.001  | 1070<br>(97.0%)   | 917<br>(98.3%)          | 0.080   |
|                                      | Manual labour       | 857<br>(37.5%)    | 388<br>(26.4%)           |         | 843<br>(71.2%)    | 843<br>(71.2%)          |         | 14<br>(1.3%)      | 10<br>(1.1%)            |         |
|                                      | Non-manual labour   | 370<br>(11.8%)    | 69<br>(4.5%)             |         | 251<br>(21.2%)    | 251<br>(21.2%)          |         | 19<br>(1.7%)      | 6 (0.6%)                |         |
| <b>Wealth Tertiles</b>               | Most poor           | 822<br>(35.9%)    | 387<br>(26.3%)           | <0.001  | 431<br>(36.4%)    | 154<br>(28.7%)          | 0.004   | 391<br>(35.5%)    | 233<br>(25.0%)          | <0.001  |
|                                      | Poor                | 784<br>(34.3%)    | 529<br>(36.0%)           |         | 439<br>(37.1%)    | 210<br>(39.1%)          |         | 345<br>(31.3%)    | 319<br>(34.2%)          |         |
|                                      | Least poor          | 681<br>(29.8%)    | 554<br>(37.7%)           |         | 314<br>(26.5%)    | 173<br>(32.2%)          |         | 367<br>(33.3%)    | 481<br>(40.8%)          |         |
| <b>Self-reported diabetes status</b> | Not reported        | 2191<br>(95.8%)   | 1605<br>(97.0%)          | 0.094   | 1137<br>(96.0%)   | 527<br>(98.1%)          | 0.024   | 1054<br>(95.6%)   | 897<br>(96.1%)          | 0.512   |
|                                      | Reported            | 96 (4.2%)         | 49<br>(3.0%)             |         | 47<br>(4.0%)      | 10<br>(1.9%)            |         | 49<br>(4.4%)      | 36<br>(3.9%)            |         |

p-value from X<sup>2</sup> test

\*p-value from Fisher's Exact test

**S3: Impact of mHealth and PLA on secondary outcomes stratified by gender, age groups and wealth tertiles. Measures of effect are beta coefficients where the measure is continuous (eg, mean or median) and are odds ratios where the measure is %.**

| Secondary Outcomes                                |         | Gender                         |                                | Age Group (years)              |                                |                                |                                | Wealth Tertiles                |                                |                                |
|---------------------------------------------------|---------|--------------------------------|--------------------------------|--------------------------------|--------------------------------|--------------------------------|--------------------------------|--------------------------------|--------------------------------|--------------------------------|
|                                                   |         | Male                           | Female                         | 30-39                          | 40-49                          | 50-59                          | ≥60                            | 1 (most poor)                  | 2                              | 3 (least poor)                 |
| Mean diastolic blood pressure (SD) (mmHg)         | control | 74.27 (10.49)                  | 73.64 (11.76)                  | 72.80 (10.49)                  | 73.49 (11.00)                  | 74.61 (11.60)                  | 75.67 (11.91)                  | 75.34 (11.47)                  | 73.58 (11.21)                  | 73.10 (10.78)                  |
|                                                   | mHealth | 73.06 (10.25)                  | 72.68 (11.25)                  | 71.46 (10.22)                  | 72.84 (10.57)                  | 74.59 (11.47)                  | 73.90 (11.61)                  | 74.29 (11.16)                  | 72.62 (10.70)                  | 71.76 (10.44)                  |
|                                                   | PLA     | 74.19 (10.97)                  | 73.42 (11.35)                  | 71.83 (10.25)                  | 74.40 (11.22)                  | 73.83 (10.78)                  | 74.61 (11.60)                  | 74.63 (11.66)                  | 72.72 (10.77)                  | 73.78 (10.86)                  |
| Mean diastolic blood pressure coefficient (95%CI) | control | REF                            | REF                            | REF                            | REF                            | REF                            | REF                            | REF                            | REF                            | REF                            |
|                                                   | mHealth | -1.23 (-2.73, 0.27)<br>p=0.109 | -1.00 (-2.58, 0.56)<br>p=0.214 | -1.21 (-2.81, 0.38)<br>p=0.136 | -0.78 (-2.40, 0.83)<br>p=0.340 | -0.55 (-2.39, 1.29)<br>p=0.558 | -1.70 (-3.53, 0.13)<br>p=0.069 | -1.00 (-2.81, 0.81)<br>p=0.278 | -0.75 (-2.44, 0.95)<br>p=0.388 | -0.94 (-6.33, 4.46)<br>p=0.734 |
|                                                   | PLA     | -0.17 (-1.76, 1.42)<br>p=0.835 | -0.34 (-1.97, 1.29)<br>p=0.684 | -1.02 (-2.71, 0.65)<br>p=0.229 | 0.65 (-1.08, 2.38)<br>p=0.463  | 0.73 (-1.01, 2.48)<br>p=0.410  | -1.00 (-2.99, 0.99)<br>p=0.321 | -0.65 (-2.43, 1.12)<br>p=0.470 | 0.68 (-2.60, 1.24)<br>p=0.487  | 0.29 (-1.34, 1.93)<br>p=0.728  |
| Mean systolic blood pressure (SD) (mmHg)          | control | 125.32 (19.58)                 | 125.60 (21.85)                 | 120.11 (15.63)                 | 122.43 (18.41)                 | 127.90 (20.19)                 | 127.97 (19.44)                 | 127.17 (20.67)                 | 124.80 (20.50)                 | 125.54 (20.18)                 |
|                                                   | mHealth | 123.37 (17.78)                 | 125.30 (21.68)                 | 118.56 (14.70)                 | 121.67 (17.82)                 | 126.21 (20.52)                 | 126.29 (20.57)                 | 126.83 (21.27)                 | 124.14 (19.47)                 | 122.49 (19.19)                 |
|                                                   | PLA     | 125.30 (18.36)                 | 125.33 (20.67)                 | 118.30 (14.60)                 | 124.08 (18.50)                 | 126.51 (20.13)                 | 126.53 (20.19)                 | 126.48 (19.87)                 | 123.65 (18.75)                 | 125.54 (20.18)                 |

|                                                                         |                |                                |                                 |                                |                                |                               |                                |                                |                                 |                                 |
|-------------------------------------------------------------------------|----------------|--------------------------------|---------------------------------|--------------------------------|--------------------------------|-------------------------------|--------------------------------|--------------------------------|---------------------------------|---------------------------------|
| <b>Mean systolic blood pressure coefficient (95%CI)</b>                 | <b>control</b> | <b>REF</b>                     | <b>REF</b>                      | <b>REF</b>                     | <b>REF</b>                     | <b>REF</b>                    | <b>REF</b>                     | <b>REF</b>                     | <b>REF</b>                      | <b>REF</b>                      |
|                                                                         | <b>mHealth</b> | -1.90 (-4.42, 0.60)<br>p=0.103 | -0.31 (-2.96, 2.33)<br>p=0.816  | -1.53 (-3.93, 0.87)<br>p=0.210 | -0.80 (-3.44, 1.84)<br>p=0.551 | 0.01 (-3.25, 3.26)<br>p=0.996 | -2.47 (-5.92, 0.97)<br>p=0.160 | -0.32 (-3.39, 2.76)<br>p=0.839 | -0.130 (-2.76, 2.50)<br>p=0.923 | -2.32 (-4.97, -0.34)<br>p=0.087 |
|                                                                         | <b>PLA</b>     | -0.02 (-2.50, 2.47)<br>p=0.990 | -0.301 (-2.86, 2.26)<br>p=0.818 | -1.89 (-4.13, 0.34)<br>p=0.097 | 1.44 (-1.14, 4.03)<br>p=0.273  | 1.76 (-1.38, 4.89)<br>p=0.273 | -1.55 (-5.43, 2.34)<br>p=0.435 | -0.72 (-3.29, 1.85)<br>p=0.584 | -0.84 (-3.68, 2.00)<br>p=0.563  | 0.63 (-2.25, 3.51)<br>p=0.668   |
| <b>Hypertension n(%)</b>                                                | <b>control</b> | 374 (20.8%)                    | 524 (25.9%)                     | 150 (11.9%)                    | 179 (17.4%)                    | 206 (29.3%)                   | 363 (43.9%)                    | 312 (27.5%)                    | 257 (20.6%)                     | 321 (23.0%)                     |
|                                                                         | <b>mHealth</b> | 302 (17.4%)                    | 551 (26.7%)                     | 122 (10.6%)                    | 175 (17.3%)                    | 218 (27.2%)                   | 338 (40.5%)                    | 333 (27.7%)                    | 267 (20.5%)                     | 251 (19.8%)                     |
|                                                                         | <b>PLA</b>     | 381 (22.3%)                    | 565 (27.6%)                     | 133 (11.0%)                    | 233 (23.3%)                    | 222 (30.0%)                   | 358 (44.2%)                    | 423 (28.6%)                    | 245 (20.7%)                     | 274 (25.4%)                     |
| <b>Hypertension OR (95%CI)</b>                                          | <b>control</b> | <b>REF</b>                     | <b>REF</b>                      | <b>REF</b>                     | <b>REF</b>                     | <b>REF</b>                    | <b>REF</b>                     | <b>REF</b>                     | <b>REF</b>                      | <b>REF</b>                      |
|                                                                         | <b>mHealth</b> | 0.80 (0.62, 1.04)<br>p=0.093   | 1.04 (0.85, 1.28)<br>p=0.688    | 0.90 (0.65, 1.23)<br>p=0.499   | 0.99 (0.75, 1.3)<br>p=0.964    | 0.91 (0.67, 1.23)<br>p=0.534  | 0.87 (0.68, 1.12)<br>p=0.274   | 0.99 (0.76, 1.29)<br>p=0.945   | 1.04 (0.80, 1.35)<br>p=0.787    | 0.84 (0.67, 1.04)<br>p=0.111    |
|                                                                         | <b>PLA</b>     | 1.08 (0.84, 1.43)<br>p=0.501   | 1.08 (0.85, 1.36)<br>p=0.543    | 0.92 (0.65, 1.29)<br>p=0.614   | 1.42 (1.06, 1.90)<br>p=0.018   | 1.06 (0.76, 1.48)<br>p=0.737  | 1.03 (0.76, 1.41)<br>p=0.870   | 1.02 (0.77, 1.35)<br>p=0.912   | 1.04 (0.78, 1.38)<br>p=0.789    | 1.11 (0.84, 1.47)<br>p=0.454    |
| <b>Hypertension control (among those with known hypertension) n (%)</b> | <b>control</b> | 34 (36.2%)                     | 56 (34.4%)                      | 14 (38.9%)                     | 21 (38.9%)                     | 24 (40.7%)                    | 31 (28.7%)                     | 41 (35.7%)                     | 23 (34.3%)                      | 26 (34.7%)                      |
|                                                                         | <b>mHealth</b> | 36 (39.1%)                     | 85 (38.6%)                      | 14 (50.0%)                     | 30 (49.2%)                     | 37 (38.5%)                    | 40 (31.5%)                     | 58 (37.9%)                     | 29 (34.9%)                      | 34 (44.7%)                      |
|                                                                         | <b>PLA</b>     | 37 (31.4%)                     | 92 (43.8%)                      | 18 (50.0%)                     | 41 (49.4%)                     | 28 (32.6%)                    | 41 (34.2%)                     | 75 (40.1%)                     | 32 (41.6%)                      | 22 (34.4%)                      |

|                                                                              |                |                                |                               |                                |                                |                                |                               |                                |                                |                                |
|------------------------------------------------------------------------------|----------------|--------------------------------|-------------------------------|--------------------------------|--------------------------------|--------------------------------|-------------------------------|--------------------------------|--------------------------------|--------------------------------|
| <b>Hypertension control (among those with known hypertension) OR (95%CI)</b> | <b>control</b> | <b>REF</b>                     | <b>REF</b>                    | <b>REF</b>                     | <b>REF</b>                     | <b>REF</b>                     | <b>REF</b>                    | <b>REF</b>                     | <b>REF</b>                     | <b>REF</b>                     |
|                                                                              | <b>mHealth</b> | 0.99 (0.51, 1.93)<br>p=0.984   | 1.16 (0.74, 1.84)<br>p=0.519  | 1.67 (0.60, 4.62%)<br>p=0.327  | 1.49 (0.70, 3.17)<br>p=0.303   | 0.84 (0.36, 1.95)<br>p=0.679   | 1.04 (0.59, 1.86)<br>p=0.882  | 1.03 (0.62, 1.71)<br>p=0.916   | 1.03 (0.52, 2.04)<br>p=0.925   | 1.34 (0.68, 2.64)<br>p=0.401   |
|                                                                              | <b>PLA</b>     | 0.71 (0.35, 1.43)<br>p=0.333   | 1.55 (0.93, 2.57)<br>p=0.090  | 1.72 (0.48, 6.18)<br>p=0.403   | 1.55 (0.76, 3.15)<br>p=0.229   | 0.74 (0.36, 1.53)<br>p=0.422   | 1.20 (0.66, 2.16)<br>p=0.554  | 1.10 (0.67, 1.81)<br>p=0.706   | 1.40 (0.54, 3.61)<br>p=0.486   | 0.91 (0.44, 1.89)<br>p=0.801   |
| <b>Mean BMI (SD) (kg/m<sup>2</sup>)</b>                                      | <b>control</b> | 21.63 (3.27)                   | 22.18 (3.78)                  | 22.75 (3.52)                   | 22.34 (3.62)                   | 21.57 (3.42)                   | 20.45 (3.17)                  | 22.99 (3.75)                   | 21.77 (3.44)                   | 21.18 (3.31)                   |
|                                                                              | <b>mHealth</b> | 21.43 (3.22)                   | 22.23 (3.92)                  | 22.50 (3.66)                   | 22.25 (3.63)                   | 21.53 (3.61)                   | 20.83 (3.39)                  | 22.89 (3.87)                   | 21.60 (3.35)                   | 21.18 (3.49)                   |
|                                                                              | <b>PLA</b>     | 21.54 (3.23)                   | 22.39 (3.91)                  | 22.53 (3.53)                   | 22.40 (3.64)                   | 21.94 (3.74)                   | 20.81 (3.43)                  | 22.83 (3.88)                   | 21.53 (3.38)                   | 21.39 (3.37)                   |
| <b>Mean BMI coefficient (95%CI)</b>                                          | <b>control</b> | <b>REF</b>                     | <b>REF</b>                    | <b>REF</b>                     | <b>REF</b>                     | <b>REF</b>                     | <b>REF</b>                    | <b>REF</b>                     | <b>REF</b>                     | <b>REF</b>                     |
|                                                                              | <b>mHealth</b> | -0.19 (-0.46, 0.74)<br>p=0.157 | 0.05 (-0.25, 0.36)<br>p=0.729 | -0.21 (-0.55, 0.13)<br>p=0.223 | -0.09 (-0.40, 0.22)<br>p=0.578 | -0.02 (-0.46, 0.41)<br>p=0.917 | 0.35 (0.01, 0.71)<br>p=0.054  | -0.51 (-0.36, 0.26)<br>p=0.746 | -0.13 (-0.48, 0.22)<br>p=0.464 | -0.04 (-0.30, 0.23)<br>p=0.793 |
|                                                                              | <b>PLA</b>     | -0.08 (-0.44, 0.29)<br>p=0.671 | 0.22 (-0.11, 0.55)<br>p=0.191 | -0.22 (-0.60, 0.15)<br>p=0.246 | -0.34 (-0.34, 0.41)<br>p=0.858 | 0.36 (-0.16, 0.87)<br>p=0.174  | 0.36 (-0.04, 0.77)<br>p=0.080 | -0.12 (-0.52, 0.27)<br>p=0.542 | -0.20 (-0.58, 0.18)<br>p=0.296 | 0.14 (-0.23, 0.51)<br>p=0.468  |
| <b>Overweight or obese n(%)</b>                                              | <b>control</b> | 559 (31.1%)                    | 764 (37.8%)                   | 546 (43.2%)                    | 399 (38.8%)                    | 208 (29.6%)                    | 170 (20.6%)                   | 528 (46.6%)                    | 409 (32.8%)                    | 369 (26.4%)                    |
|                                                                              | <b>mHealth</b> | 480 (27.7%)                    | 782 (37.9%)                   | 458 (39.8%)                    | 372 (36.9%)                    | 244 (30.4%)                    | 188 (22.5%)                   | 544 (45.2%)                    | 394 (30.1%)                    | 322 (25.4%)                    |
|                                                                              | <b>PLA</b>     | 495 (29.0%)                    | 828 (40.4%)                   | 503 (41.7%)                    | 394 (39.4%)                    | 237 (32.1%)                    | 189 (23.3%)                   | 650 (43.9%)                    | 350 (29.5%)                    | 320 (29.7%)                    |

|                                                                                        |                |                              |                              |                              |                               |                              |                              |                              |                              |                              |
|----------------------------------------------------------------------------------------|----------------|------------------------------|------------------------------|------------------------------|-------------------------------|------------------------------|------------------------------|------------------------------|------------------------------|------------------------------|
| <b>Overweight or obese OR (95%CI)</b>                                                  | <b>control</b> | <b>REF</b>                   | <b>REF</b>                   | <b>REF</b>                   | <b>REF</b>                    | <b>REF</b>                   | <b>REF</b>                   | <b>REF</b>                   | <b>REF</b>                   | <b>REF</b>                   |
|                                                                                        | <b>mHealth</b> | 0.85 (0.72, 0.99)<br>p=0.040 | 1.01 (0.87, 1.17)<br>p=0.927 | 0.89 (0.74, 1.06)<br>p=0.185 | 0.93 (0.77, 1.11) p=<br>0.409 | 1.02 (0.81, 1.28)<br>p=0.856 | 1.12 (0.84, 1.49)<br>p=0.456 | 0.96 (0.81, 1.14)<br>p=0.641 | 0.9 (0.74, 1.09)<br>p=0.274  | 0.93 (0.78, 1.11)<br>p=0.403 |
|                                                                                        | <b>PLA</b>     | 0.91 (0.73, 1.13)<br>p=0.398 | 1.12 (0.96, 1.30)<br>p=0.156 | 0.95 (0.76, 1.18)<br>p=0.625 | 1.02 (0.83, 1.25)<br>p=0.876  | 1.09 (0.84, 1.42)<br>p=0.525 | 1.20 (0.88, 1.63)<br>p=0.250 | 0.90 (0.74, 1.11)<br>p=0.327 | 0.85 (0.67, 1.08)<br>p=0.178 | 1.1 (0.88, 1.42)<br>p=0.366  |
| <b>Abdominal Obesity (waist:hip ratio &gt;0.9 for men and &gt;0.85 for women) n(%)</b> | <b>control</b> | 1450 (80.7%)                 | 465 (23.0%)                  | 327 (25.9%)                  | 281 (27.3%)                   | 195 (27.8%)                  | 205 (24.8%)                  | 319 (28.4%)                  | 286 (23.2%)                  | 394 (28.2%)                  |
|                                                                                        | <b>mHealth</b> | 1429 (82.5%)                 | 505 (24.46%)                 | 292 (25.4%)                  | 289 (28.6%)                   | 246 (30.6%)                  | 203 (24.3%)                  | 342 (28.4%)                  | 304 (23.2%)                  | 382 (30.2%)                  |
|                                                                                        | <b>PLA</b>     | 1428 (83.7%)                 | 455 (22.2%)                  | 314 (26.0%)                  | 316 (31.6%)                   | 217 (29.4%)                  | 205 (25.3%)                  | 433 (29.2%)                  | 301 (25.4%)                  | 315 (29.2%)                  |
| <b>Abdominal Obesity OR (95%CI)</b>                                                    | <b>control</b> | <b>REF</b>                   | <b>REF</b>                   | <b>REF</b>                   | <b>REF</b>                    | <b>REF</b>                   | <b>REF</b>                   | <b>REF</b>                   | <b>REF</b>                   | <b>REF</b>                   |
|                                                                                        | <b>mHealth</b> | 1.14 (0.85, 1.52)<br>p=0.395 | 1.05 (0.75, 1.47)<br>p=0.780 | 0.85 (0.53, 1.36)<br>p=0.503 | 1.08 (0.70, 1.65)<br>p=0.732  | 1.03 (0.63, 1.70)<br>p=0.899 | 0.97 (0.61, 1.53)<br>p=0.900 | 0.94 (0.69, 1.28)<br>p=0.680 | 1.01 (0.67, 1.54)<br>p=0.956 | 0.99 (0.57, 1.71)<br>p=0.961 |
|                                                                                        | <b>PLA</b>     | 1.22 (0.89, 1.68)<br>p=0.224 | 0.96 (0.68, 1.35)<br>p=0.815 | 0.85 (0.53, 1.36)<br>p=0.494 | 1.24 (0.80, 1.95)<br>p=0.336  | 1.17 (0.72, 1.90)<br>p=0.529 | 1.18(0.73, 1.93)<br>p=0.499  | 0.98 (0.66, 1.46)<br>p=0.921 | 1.13 (0.73, 1.77)<br>p=0.577 | 1.14 (0.69, 1.88)<br>p=0.608 |
| <b>Median lnEQ5D‡ (IQR)</b>                                                            | <b>control</b> | 0.85 (0.73, 1.00)            | 0.73 (0.73, 0.85)            | 0.85 (0.73, 1.00)            | 0.85 (0.73, 1.00)             | 0.73 (0.73, 0.85)            | 0.73 (0.59, 0.85)            | 0.85 (0.73, 1.00)            | 0.85 (0.73, 1.00)            | 0.73 (0.69, 0.85)            |
|                                                                                        | <b>mHealth</b> | 0.85 (0.73, 1.00)            | 0.73 (0.73, 0.85)            | 0.85 (0.73, 1.00)            | 0.85 (0.73, 1.00)             | 0.80 (0.73, 1.00)            | 0.73 (0.62, 0.85)            | 0.85 (0.73, 1.00)            | 0.85 (0.73, 1.00)            | 0.80 (0.73, 1.00)            |
|                                                                                        | <b>PLA</b>     | 0.85 (0.73, 1.00)            | 0.73 (0.73, 0.85)            | 0.85 (0.73, 1.00)            | 0.81 (0.73, 1.00)             | 0.73 (0.73, 0.85)            | 0.73 (0.59, 0.85)            | 0.82 (0.73, 1.00)            | 0.85 (0.73, 1.00)            | 0.73 (0.73, 0.85)            |

|                                                                   |                |                                |                                |                                |                               |                                |                                |                                |                               |                                |
|-------------------------------------------------------------------|----------------|--------------------------------|--------------------------------|--------------------------------|-------------------------------|--------------------------------|--------------------------------|--------------------------------|-------------------------------|--------------------------------|
| <b>Median InEQ5D<sup>‡</sup> coefficient (95%CI)</b>              | <b>control</b> | <b>REF</b>                     | <b>REF</b>                     | <b>REF</b>                     | <b>REF</b>                    | <b>REF</b>                     | <b>REF</b>                     | <b>REF</b>                     | <b>REF</b>                    | <b>REF</b>                     |
|                                                                   | <b>mHealth</b> | 0.00 (-0.05, 0.05)<br>p=0.860  | 0.05 (-0.01, 0.11)<br>p=0.078  | 0.02 (-0.02, 0.06)<br>p=0.359  | 0.04 (-0.01, 0.10)<br>p=0.145 | 0.05 (-0.01, 0.11)<br>p=0.133  | 0.02 (-0.07, 0.11)<br>p=0.639  | 0.00 (-0.06, 0.05)<br>p=0.876  | 0.03 (-0.03, 0.08)<br>p=0.333 | 0.05 (0.00, 0.10)<br>p=0.033   |
|                                                                   | <b>PLA</b>     | -0.00 (-0.05, 0.04)<br>p=0.906 | -0.01 (-0.07, 0.05)<br>p=0.717 | -0.01 (-0.05, 0.04)<br>p=0.783 | 0.00 (-0.05, 0.06)<br>p=0.877 | -0.01 (-0.07, 0.05)<br>p=0.817 | -0.02 (-0.10, 0.06)<br>p=0.628 | -0.02 (-0.07, 0.04)<br>p=0.561 | 0.00 (-0.05, 0.05)<br>p=0.972 | -0.02 (-0.73, 0.02)<br>p=0.321 |
| <b>Mean self-rated health (SD)</b>                                | <b>control</b> | 77.27 (15.61)                  | 72.08 (16.13)                  | 77.62 (14.34)                  | 76.87 (14.34)                 | 71.97 (15.35)                  | 67.51 (17.77)                  | 77.04 (15.03)                  | 75.60 (15.99)                 | 71.51 (16.56)                  |
|                                                                   | <b>mHealth</b> | 79.82 (15.32)                  | 74.03 (16.06)                  | 79.27 (15.15)                  | 76.89 (15.04)                 | 75.00 (15.08)                  | 70.08 (16.65)                  | 77.40 (15.83)                  | 78.17 (15.79)                 | 74.44 (16.11)                  |
|                                                                   | <b>PLA</b>     | 80.24 (14.51)                  | 76.01 (16.03)                  | 83.51 (13.12)                  | 79.48 (14.72)                 | 78.31 (14.25)                  | 70.24 (15.27)                  | 80.09 (14.92)                  | 78.03 (15.26)                 | 74.89 (16.04)                  |
| <b>Mean self-rated health coefficient (95%CI)</b>                 | <b>control</b> | <b>REF</b>                     | <b>REF</b>                     | <b>REF</b>                     | <b>REF</b>                    | <b>REF</b>                     | <b>REF</b>                     | <b>REF</b>                     | <b>REF</b>                    | <b>REF</b>                     |
|                                                                   | <b>mHealth</b> | 2.43 (-0.82, 5.69)<br>p=0.143  | 1.92 (-1.04, 4.89)<br>p=0.204  | 1.19 (-3.21, 5.61)<br>p=0.595  | 0.44 (-3.40, 4.27)<br>p=0.824 | 3.02 (-1.54, 7.58)<br>p=0.195  | 2.92 (-1.67, 7.51)<br>p=0.213  | 0.54 (-2.49, 3.58)<br>p=0.725  | 2.26 (-1.13, 5.64)<br>p=0.191 | 2.44 (-0.60, 5.37)<br>p=0.115  |
|                                                                   | <b>PLA</b>     | 2.89 (-0.38, 6.17)<br>p=0.083  | 3.83 (0.75, 6.93)<br>p=0.015   | 5.72 (2.63, 8.81)<br>p<0.001   | 2.50 (-0.93, 5.94)<br>p=0.153 | 6.34 (1.54, 11.13)<br>p=0.009  | 2.86 (-1.25, 6.97)<br>p=0.172  | 2.48 (-0.65, 5.60)<br>p=0.120  | 2.34 (-1.16, 5.85)<br>p=0.190 | 3.55 (0.76, 6.34)<br>p=0.013   |
| <b>Median SRQ20 (IQR) among those with self-reported diabetes</b> | <b>control</b> | 7.0 (4.0,10.0)                 | 9.0 (7.0,13.0)                 | 7.0 (6.0, 11.0)                | 9.0 (9.0, 9.0)                | 12.0 (4.0,20.0)                | 9.5 (5.0, 14.0)                | 8.0 (4.0,11.0)                 | 9.0 (8.0,11.0)                | 10.0 (7.0,14.0)                |
|                                                                   | <b>mHealth</b> | 5.5 (4.0,9.0)                  | 7.0 (4.0,9.0)                  | na                             | 3.0 (0.0,5.0)                 | 8.5 (4.0,11.0)                 | 2.0 (0.0,5.5)                  | 6.0 (3.5,9.0)                  | 5 (3.0,8.0)                   | 9.0 (5.0,11.0)                 |
|                                                                   | <b>PLA</b>     | 8.0 (6.0,11.0)                 | 7.5 (4.0,13.0)                 | 9.5 (8.0,11.0)                 | 4.0 (0.0,15.0)                | 10.5 (3.0,18.0)                | 6.5 (0.0,13.0)                 | 7 (4.0,11.0)                   | 9.5 (5.0,13.0)                | 11.0 (4.0,14.0)                |

|                                                                 |                |                                |                                 |                                                   |                                  |                                 |                                 |                                 |                                 |                                 |
|-----------------------------------------------------------------|----------------|--------------------------------|---------------------------------|---------------------------------------------------|----------------------------------|---------------------------------|---------------------------------|---------------------------------|---------------------------------|---------------------------------|
| <b>Median InSRQ20 coefficient (95%CI)</b>                       | <b>control</b> | <b>REF</b>                     | <b>REF</b>                      | Insufficient observations for regression analysis |                                  |                                 |                                 | <b>REF</b>                      | <b>REF</b>                      | <b>REF</b>                      |
|                                                                 | <b>mHealth</b> | -0.12 (-0.43, 0.20)<br>p=0.460 | -0.16 (-0.37, 0.05)<br>p=0.141  |                                                   |                                  |                                 |                                 | -0.10 (-0.40, 0.20)<br>p=0.514  | -0.51 (-0.80, -0.21)<br>p=0.001 | -0.04 (-0.32, 0.24)<br>p=0.797  |
|                                                                 | <b>PLA</b>     | 0.13 (-0.20, 0.47)<br>p=0.430  | -0.04 (-0.28, 0.19)<br>p=0.734  |                                                   |                                  |                                 |                                 | 0.15 (-0.08, 0.37)<br>p=0.202   | -0.15 (-0.49, 0.19)<br>p=0.377  | -0.15 (-0.49, 0.19)<br>p=0.377  |
| <b>Ability to report ≥1 valid causes of diabetes n (%)</b>      | <b>control</b> | 1044 (58.1%)                   | 1105 (54.6%)                    | 757 (59.9%)                                       | 604 (58.8%)                      | 394 (56.1%)                     | 394 (47.6%)                     | 775 (68.4%)                     | 734 (58.8%)                     | 640 (45.8%)                     |
|                                                                 | <b>mHealth</b> | 1356 (78.3%)                   | 1610 (78.0%)                    | 956 (83.1%)                                       | 841 (83.4%)                      | 622 (77.5%)                     | 547 (65.6%)                     | 1025 (85.1%)                    | 1037 (79.1%)                    | 904 (71.4%)                     |
|                                                                 | <b>PLA</b>     | 1634 (95.7%)                   | 1966 (95.9%)                    | 1170 (96.9%)                                      | 967 (96.6%)                      | 714 (96.6%)                     | 749 (92.5%)                     | 1439 (97.2%)                    | 1139 (96.1%)                    | 1022 (94.7%)                    |
| <b>Ability to report ≥1 valid causes of diabetes OR (95%CI)</b> | <b>control</b> | <b>REF</b>                     | <b>REF</b>                      | <b>REF</b>                                        | <b>REF</b>                       | <b>REF</b>                      | <b>REF</b>                      | <b>REF</b>                      | <b>REF</b>                      | <b>REF</b>                      |
|                                                                 | <b>mHealth</b> | 3.49 (1.82, 6.71)<br>p<0.001   | 3.86 (2.19, 6.80)<br>p<0.001    | 3.64 (2.00, 6.65)<br>p<0.001                      | 4.13 (2.24, 7.59)<br>p<0.001     | 3.62 (1.98, 6.62)<br>p<0.001    | 2.63 (1.50, 4.63)<br>p<0.001    | 3.14 (1.77, 5.55)<br>p<0.001    | 3.34 (1.81, 6.14)<br>p<0.001    | 3.68 (1.98, 6.84)<br>p<0.001    |
|                                                                 | <b>PLA</b>     | 32.96 (15.9, 68.48)<br>p<0.001 | 42.27 (19.95, 89.56)<br>p<0.001 | 38.10 (17.35, 83.68)<br>p<0.001                   | 52.67 (20.45, 125.57)<br>p<0.001 | 40.51 (18.75, 87.53)<br>p<0.001 | 23.70 (11.67, 48.15)<br>p<0.001 | 30.61 (14.80, 63.35)<br>p<0.001 | 26.34 (12.40, 5.96)<br>p<0.001  | 37.66 (18.12, 78.30)<br>p<0.001 |
| <b>Ability to report ≥1 valid symptoms of diabetes n (%)</b>    | <b>control</b> | 1156 (64.3%)                   | 1291 (63.8%)                    | 853 (67.5%)                                       | 683 (66.4%)                      | 451 (64.3%)                     | 460 (55.6%)                     | 866 (76.4%)                     | 831 (66.6%)                     | 750 (53.7%)                     |
|                                                                 | <b>mHealth</b> | 1456 (84.1%)                   | 1734 (84.0%)                    | 1011 (87.8%)                                      | 886 (87.8%)                      | 666 (82.9%)                     | 627 (75.2%)                     | 1089 (90.5%)                    | 1102 (84.1%)                    | 999 (78.9%)                     |
|                                                                 | <b>PLA</b>     | 1634 (95.7%)                   | 1979 (96.5%)                    | 1174 (97.3%)                                      | 969 (96.8%)                      | 713 (96.5%)                     | 757 (93.5%)                     | 1441 (97.3%)                    | 1143 (96.5%)                    | 1029 (95.4%)                    |



|                                                                                                  |                |                                 |                                 |                                  |                                  |                                 |                                 |                                 |                                 |                                 |
|--------------------------------------------------------------------------------------------------|----------------|---------------------------------|---------------------------------|----------------------------------|----------------------------------|---------------------------------|---------------------------------|---------------------------------|---------------------------------|---------------------------------|
| <b>Ability to report <math>\geq 1</math> valid symptoms of diabetes OR (95%CI)</b>               | <b>control</b> | <b>REF</b>                      | <b>REF</b>                      | <b>REF</b>                       | <b>REF</b>                       | <b>REF</b>                      | <b>REF</b>                      | <b>REF</b>                      | <b>REF</b>                      | <b>REF</b>                      |
|                                                                                                  | <b>mHealth</b> | 4.28 (1.85, 9.93)<br>p<0.001    | 4.07 (2.09, 7.90)<br>p<0.001    | 4.08 (2.01, 8.31)<br>p<0.001     | 4.60 (2.22, 9.56)<br>p<0.001     | 3.72 (1.80, 7.67)<br>p<0.001    | 3.29 (1.62, 6.67)<br>p<0.001    | 3.43 (1.71, 6.86)<br>p<0.001    | 3.59 (1.65, 7.80)<br>p<0.001    | 4.47 (2.06, 9.68)<br>p<0.001    |
|                                                                                                  | <b>PLA</b>     | 22.82 (10.12, 51.48)<br>p<0.001 | 31.85 (13.88, 73.11)<br>p<0.001 | 28.46 (12.38, 65.53)<br>p<0.001  | 34.11 (13.26, 87.72)<br>p<0.001  | 24.92 (10.89, 57.01)<br>p<0.001 | 19.63 (9.04, 42.06)<br>p<0.001  | 20.34 (8.86, 46.68)<br>p<0.001  | 21.12 (8.71, 51.17)<br>p<0.001  | 29.00 (13.36, 62.96)<br>p<0.001 |
| <b>Ability to report <math>\geq 1</math> valid complications of diabetes n (%)</b>               | <b>control</b> | 1049 (58.4%)                    | 1107 (54.7%)                    | 744 (58.9%)                      | 598 (58.2%)                      | 403 (57.4%)                     | 411 (49.7%)                     | 788 (69.6%)                     | 726 (58.2%)                     | 642 (45.7%)                     |
|                                                                                                  | <b>mHealth</b> | 1395 (80.5%)                    | 1674 (81.1%)                    | 972 (84.5%)                      | 866 (85.8%)                      | 641 (79.8%)                     | 590 (70.7%)                     | 1061 (88.1%)                    | 1054 (80.4%)                    | 954 (75.3%)                     |
|                                                                                                  | <b>PLA</b>     | 1631 (95.6%)                    | 1973 (96.2%)                    | 1172 (97.1%)                     | 964 (96.3%)                      | 714 (96.6%)                     | 754 (93.0%)                     | 1434 (96.8%)                    | 1143 (96.5%)                    | 1027 (95.2%)                    |
| <b>Ability to report <math>\geq 1</math> valid complications of diabetes OR (95%CI)</b>          | <b>control</b> | <b>REF</b>                      | <b>REF</b>                      | <b>REF</b>                       | <b>REF</b>                       | <b>REF</b>                      | <b>REF</b>                      | <b>REF</b>                      | <b>REF</b>                      | <b>REF</b>                      |
|                                                                                                  | <b>mHealth</b> | 4.92 (2.16, 11.19)<br>p<0.001   | 5.46 (2.75, 10.85)<br>p<0.001   | 4.72 (2.26, 9.86)<br>p<0.001     | 6.37 (3.11, 13.06)<br>p<0.001    | 4.47 (2.25, 8.85)<br>p<0.001    | 3.65 (1.85, 7.20)<br>p<0.001    | 4.23 (2.27, 7.88)<br>p<0.001    | 4.75 (2.17, 9.65)<br>p<0.001    | 4.58 (2.17, 9.65)<br>p<0.001    |
|                                                                                                  | <b>PLA</b>     | 34.59 (15.93, 74.09)<br>p<0.001 | 46.26 (21.43, 99.89)<br>p<0.001 | 47.15 (19.74, 112.64)<br>p<0.001 | 49.63 (20.25, 121.63)<br>p<0.001 | 37.60 (18.25, 77.49)<br>p<0.001 | 25.14 (12.36, 51.14)<br>p<0.001 | 29.79 (13.95, 63.60)<br>p<0.001 | 35.61 (15.53, 81.64)<br>p<0.001 | 45.26 (20.59, 99.45)<br>p<0.001 |
| <b>Ability to report <math>\geq 1</math> valid complications of diabetes when prompted n (%)</b> | <b>control</b> | 1407 (78.3%)                    | 1519 (75.1%)                    | 991 (78.4%)                      | 808 (78.6%)                      | 542 (77.2%)                     | 585 (70.7%)                     | 983 (86.8%)                     | 978 (78.4%)                     | 965 (69.1%)                     |
|                                                                                                  | <b>mHealth</b> | 1523 (87.9%)                    | 1829 (88.6%)                    | 1049 (91.1%)                     | 924 (91.6%)                      | 701 (87.3%)                     | 678 (81.3%)                     | 1131 (93.9%)                    | 1160 (88.5%)                    | 1061 (83.7%)                    |
|                                                                                                  | <b>PLA</b>     | 1664 (97.5%)                    | 2013 (98.2%)                    | 1191 (98.7%)                     | 982 (98.1%)                      | 725 (88.1%)                     | 779 (96.2%)                     | 1464 (98.9%)                    | 1161 (98.0%)                    | 1052 (97.5%)                    |

|                                                                                                       |                |                                |                                 |                                  |                                |                                |                                |                                |                                |                                 |
|-------------------------------------------------------------------------------------------------------|----------------|--------------------------------|---------------------------------|----------------------------------|--------------------------------|--------------------------------|--------------------------------|--------------------------------|--------------------------------|---------------------------------|
| <b>Ability to report <math>\geq 1</math> valid complications of diabetes when prompted OR (95%CI)</b> | <b>control</b> | <b>REF</b>                     | <b>REF</b>                      | <b>REF</b>                       | <b>REF</b>                     | <b>REF</b>                     | <b>REF</b>                     | <b>REF</b>                     | <b>REF</b>                     | <b>REF</b>                      |
|                                                                                                       | <b>mHealth</b> | 3.46 (1.23, 9.70)<br>p=0.018   | 4.26 (1.69, 10.73)<br>p=0.002   | 3.54 (1.41, 8.87)<br>p=0.007     | 3.63 (1.40, 9.38)<br>p=0.008   | 3.09 (1.29, 7.40)<br>p=0.011   | 2.66 (1.18, 6.00)<br>p=0.018   | 2.80 (1.16, 6.73)<br>p=0.022   | 3.17 (1.31, 7.64)<br>p=0.010   | 3.28 (1.25, 8.67)<br>p=0.016    |
|                                                                                                       | <b>PLA</b>     | 16.46 (6.69, 40.44)<br>p<0.001 | 34.15 (11.74, 99.27)<br>p<0.001 | 41.59 (12.69, 136.33)<br>p<0.001 | 22.23 (7.89, 62.69)<br>p<0.001 | 24.76 (9.81, 62.54)<br>p<0.001 | 14.47 (6.45, 32.46)<br>p<0.001 | 18.85 (6.99, 50.82)<br>p<0.001 | 13.89 (5.71, 33.76)<br>p<0.001 | 28.07 (10.50, 75.01)<br>p<0.001 |
| <b>Ability to report <math>\geq 1</math> valid ways to prevent diabetes n (%)</b>                     | <b>control</b> | 1049 (58.4%)                   | 1107 (54.7%)                    | 904 (71.5%)                      | 720 (70.0%)                    | 486 (69.2%)                    | 511 (61.8%)                    | 892 (78.7%)                    | 889 (71.2%)                    | 840 (60.1%)                     |
|                                                                                                       | <b>mHealth</b> | 1395 (80.5%)                   | 1674 (81.1%)                    | 1021 (88.7%)                     | 909 (90.1%)                    | 697 (86.8%)                    | 652 (78.2%)                    | 1106 (91.9%)                   | 1144 (87.3%)                   | 1029 (81.2%)                    |
|                                                                                                       | <b>PLA</b>     | 1,631 (95.6%)                  | 1,973 (96.3%)                   | 1157 (95.9%)                     | 952 (95.1%)                    | 704 (95.3%)                    | 749 (92.5%)                    | 1410 (95.2%)                   | 1129 (95.3%)                   | 1023 (94.8%)                    |
| <b>Ability to report <math>\geq 1</math> valid ways to prevent diabetes OR (95%CI)</b>                | <b>control</b> | <b>REF</b>                     | <b>REF</b>                      | <b>REF</b>                       | <b>REF</b>                     | <b>REF</b>                     | <b>REF</b>                     | <b>REF</b>                     | <b>REF</b>                     | <b>REF</b>                      |
|                                                                                                       | <b>mHealth</b> | 4.00 (1.79, 8.92)<br>p=0.001   | 4.40 (2.25, 8.63)<br>p<0.001    | 3.78 (1.75, 8.17)<br>p=0.001     | 5.27 (2.58, 10.74)<br>p<0.001  | 4.25 (2.07, 8.72)<br>p<0.001   | 2.96 (1.55, 5.65)<br>p=0.001   | 3.67 (1.90, 7.10)<br>p<0.001   | 3.90 (1.82, 8.34)<br>p<0.001   | 3.85 (1.84, 8.04)<br>p<0.001    |
|                                                                                                       | <b>PLA</b>     | 8.62 (4.44, 16.72)<br>p<0.001  | 15.63 (7.30, 33.47)<br>p<0.001  | 10.69 (5.37, 21.26)<br>p<0.001   | 11.77 (5.88, 23.59)<br>p<0.001 | 11.78 (6.01, 23.10)<br>p<0.001 | 11.05 (5.68, 21.52)<br>p<0.001 | 7.97 (3.97, 16.01)<br>p<0.001  | 8.68 (4.26, 17.70)<br>p<0.001  | 16.93 (8.70, 32.95)<br>p<0.001  |
| <b>Ability to report <math>\geq 1</math> valid ways to control diabetes n (%)</b>                     | <b>control</b> | 1312 (73.0%)                   | 1477 (73.0%)                    | 971 (76.8%)                      | 769 (74.8%)                    | 518 (73.9%)                    | 531 (65.1%)                    | 935 (92.5%)                    | 941 (75.4%)                    | 913 (65.4%)                     |
|                                                                                                       | <b>mHealth</b> | 1528 (88.2%)                   | 1811 (87.7%)                    | 1042 (90.5%)                     | 918 (91.0%)                    | 714 (88.9%)                    | 665 (79.7%)                    | 1115 (92.6%)                   | 1167 (89.0%)                   | 1057 (83.4%)                    |
|                                                                                                       | <b>PLA</b>     | 1620 (94.9%)                   | 1953 (95.3%)                    | 1159 (96.0%)                     | 959 (95.8%)                    | 707 (95.7%)                    | 748 (92.4%)                    | 1414 (95.5%)                   | 1135 (95.8%)                   | 1024 (94.9%)                    |

|                                                                                                                       |                |                               |                                |                               |                                |                                |                               |                               |                               |                                |
|-----------------------------------------------------------------------------------------------------------------------|----------------|-------------------------------|--------------------------------|-------------------------------|--------------------------------|--------------------------------|-------------------------------|-------------------------------|-------------------------------|--------------------------------|
| <b>Ability to report <math>\geq 1</math> valid ways to control diabetes OR (95%CI)</b>                                | <b>control</b> | <b>REF</b>                    | <b>REF</b>                     | <b>REF</b>                    | <b>REF</b>                     | <b>REF</b>                     | <b>REF</b>                    | <b>REF</b>                    | <b>REF</b>                    | <b>REF</b>                     |
|                                                                                                                       | <b>mHealth</b> | 3.68 (1.67, 8.11)<br>p=0.001  | 3.70 (1.90, 7.23)<br>p<0.001   | 3.28 (1.58, 6.80)<br>p=0.001  | 4.29 (2.08, 8.85)<br>p<0.001   | 4.44 (1.97, 10.05)<br>p<0.001  | 2.98 (1.59, 5.58)<br>p=0.001  | 3.08 (1.58, 6.05)<br>p<0.001  | 3.68 (1.68, 8.06)<br>p<0.001  | 3.75 (1.74, 8.12)<br>p<0.001   |
|                                                                                                                       | <b>PLA</b>     | 9.22 (4.42, 19.23)<br>p<0.001 | 10.25 (4.89, 21.51)<br>p<0.001 | 8.41 (3.78, 18.70)<br>p<0.001 | 10.59 (4.98, 22.49)<br>p<0.001 | 10.68 (4.69, 24.31)<br>p<0.001 | 9.34 (4.91, 17.75)<br>p<0.001 | 6.12 (2.79, 13.40)<br>p<0.001 | 8.62 (4.12, 18.03)<br>p<0.001 | 14.45 (6.84, 30.52)<br>p<0.001 |
| <b>Diabetes control among those with known diabetes n (%)</b>                                                         | <b>control</b> | 13 (43.3%)                    | 20 (35.7%)                     | 5 (50.0%)                     | 4 (20.0%)                      | 8 (33.3%)                      | 16 (50.0%)                    | 14 (33.3%)                    | 9 (52.9%)                     | 10 (37.0%)                     |
|                                                                                                                       | <b>mHealth</b> | 28 (51.9%)                    | 29 (36.3%)                     | 11 (37.9%)                    | 11 (36.7%)                     | 23 (56.1%)                     | 12 (37.5%)                    | 36 (52.9%)                    | 13 (36.1%)                    | 8 (26.7%)                      |
|                                                                                                                       | <b>PLA</b>     | 35 (66.0%)                    | 33 (47.1%)                     | 5 (50.0%)                     | 18 (47.4%)                     | 21 (65.6%)                     | 24 (55.8%)                    | 40 (55.6%)                    | 19 (59.4%)                    | 9 (47.4%)                      |
| <b>Diabetes control among those with known diabetes OR (95%CI)</b>                                                    | <b>control</b> | <b>REF</b>                    | <b>REF</b>                     | <b>REF</b>                    | <b>REF</b>                     | <b>REF</b>                     | <b>REF</b>                    | <b>REF</b>                    | <b>REF</b>                    | <b>REF</b>                     |
|                                                                                                                       | <b>mHealth</b> | 0.96(0.35, 2.62)<br>p=0.940   | 1.13 (0.34, 3.77)<br>p=0.839   | 0.58 (0.13, 2.77)<br>p=0.503  | 1.92 (0.46, 8.01)<br>p=0.369   | 2.07 (0.44, 9.80)<br>p=0.361   | 0.43 (0.86, 2.18)<br>p=0.311  | 2.71 (0.84, 8.83)<br>p=0.096  | 0.34 (0.05, 2.24)<br>p=0.263  | 0.50 (0.12, 2.17)<br>p=0.358   |
|                                                                                                                       | <b>PLA</b>     | 3.04 (0.76, 12.07)<br>p=0.114 | 1.51 (0.64, 3.55)<br>p=0.349   | 0.23(0.00, 243.22)<br>p=0.674 | 3.75 (0.63, 22.25)<br>p=0.146  | 4.36 (0.96, 19.73)<br>p=0.056  | 1.17 (0.25, 5.46)<br>p=0.844  | 3.09 (0.98, 9.73)<br>p=0.054  | 1.25 (0.31, 4.94)<br>p=0.754  | 1.29 (0.33, 4.97)<br>p=0.714   |
| <b>Self-awareness of diabetic status among all those identified as diabetic by objective blood glucose test n (%)</b> | <b>control</b> | 37 (21.3%)                    | 57 (18.0%)                     | 11 (9.3%)                     | 24 (17.8%)                     | 25 (25.3%)                     | 34 (24.6%)                    | 45 (27.1%)                    | 18 (13.4%)                    | 31 (16.3%)                     |
|                                                                                                                       | <b>mHealth</b> | 58 (28.2%)                    | 86 (24.2%)                     | 33 (25.0%)                    | 30 (22.9%)                     | 47 (32.6%)                     | 34 (22.9%)                    | 72 (31.3%)                    | 39 (24.5%)                    | 33 (19.2%)                     |
|                                                                                                                       | <b>PLA</b>     | 57 (46.7%)                    | 80 (44.0%)                     | 14 (24.2%)                    | 43 (46.7%)                     | 35 (56.5%)                     | 45 (48.9%)                    | 78 (49.4%)                    | 34 (44.7%)                    | 25 (35.7%)                     |

|                                                                                                                            |                |                               |                              |                               |                               |                               |                               |                               |                               |                               |
|----------------------------------------------------------------------------------------------------------------------------|----------------|-------------------------------|------------------------------|-------------------------------|-------------------------------|-------------------------------|-------------------------------|-------------------------------|-------------------------------|-------------------------------|
| <b>Self-awareness of diabetic status among all those identified as diabetic by objective blood glucose test OR (95%CI)</b> | <b>control</b> | <b>REF</b>                    | <b>REF</b>                   | <b>REF</b>                    | <b>REF</b>                    | <b>REF</b>                    | <b>REF</b>                    | <b>REF</b>                    | <b>REF</b>                    | <b>REF</b>                    |
|                                                                                                                            | <b>mHealth</b> | 1.28 (0.57, 2.86)<br>p=0.550  | 1.40 (0.90, 2.19)<br>p=0.134 | 3.42 (1.47, 7.94)<br>p=0.004  | 1.16 (0.58, 2.33)<br>p=0.667  | 1.59 (0.73, 3.45)<br>p=0.232  | 0.85 (0.44, 1.66)<br>p=0.636  | 1.12 (0.61, 2.04)<br>p=0.724  | 2.16 (1.05, 4.46)<br>p=0.036  | 1.26 (0.72, 2.19)<br>p=0.420  |
|                                                                                                                            | <b>PLA</b>     | 5.27 (2.15, 12.92)<br>p<0.001 | 4.97 (2.71, 9.15)<br>p<0.001 | 6.43 (1.38, 30.02)<br>p=0.018 | 4.73 (2.16, 10.38)<br>p<0.001 | 6.77 (2.15, 21.38)<br>p=0.001 | 4.44 (1.88, 10.51)<br>p=0.001 | 4.36 (1.85, 10.23)<br>p=0.001 | 7.63 (3.07, 18.96)<br>p<0.001 | 3.78 (1.70, 8.41)<br>p=0.001  |
| <b>Receipt of professional treatment or advice for diabetes among those aware of their status n (%)</b>                    | <b>control</b> | 27 (73.0%)                    | 51 (89.5%)                   | 10 (90.9%)                    | 18 (75.0%)                    | 20 (80.0%)                    | 30 (88.2%)                    | 37 (82.2%)                    | 17 (94.4%)                    | 24 (77.4%)                    |
|                                                                                                                            | <b>mHealth</b> | 49 (84.5%)                    | 73 (84.9%)                   | 25 (75.8%)                    | 28 (93.3%)                    | 40 (85.1%)                    | 29 (85.3%)                    | 63 (87.5%)                    | 31 (79.5%)                    | 28 (84.9%)                    |
|                                                                                                                            | <b>PLA</b>     | 51 (89.5%)                    | 60 (75.0%)                   | 10 (71.4%)                    | 31 (72.1%)                    | 30 (85.7%)                    | 40 (88.9%)                    | 67 (85.9%)                    | 26 (76.5%)                    | 18 (72.0%)                    |
| <b>Receipt of professional treatment or advice for diabetes among those aware of their status OR (95%CI)</b>               | <b>control</b> | <b>REF</b>                    | <b>REF</b>                   | <b>REF</b>                    | <b>REF</b>                    | <b>REF</b>                    | <b>REF</b>                    | <b>REF</b>                    | <b>REF</b>                    | <b>REF</b>                    |
|                                                                                                                            | <b>mHealth</b> | 1.65 (0.33, 8.17)<br>p=0.539  | 0.54 (0.16, 1.90)<br>p=0.341 | 0.21 (0.01, 6.61)<br>p=0.378  | 4.64 (0.79, 27.3)<br>p=0.089  | 0.93 (0.13, 6.82)<br>p=0.947  | 0.64 (0.14, 2.97)<br>p=0.572  | 1.27 (0.42, 3.77)<br>p=0.672  | 0.248 (0.03, 2.28)<br>p=0.218 | 1.65 (0.43, 6.34)<br>p=0.465  |
|                                                                                                                            | <b>PLA</b>     | 3.51 (0.56, 22.24)<br>p=0.181 | 0.36 (0.12, 1.11)<br>p=0.074 | 1.03 (0.79, 1.35)<br>p=0.830  | 0.81 (0.25, 2.69)<br>p=0.734  | 1.71 (0.32, 9.15)<br>p=0.531  | 0.88 (0.20, 3.91)<br>p=0.863  | 1.53 (0.37, 6.34)<br>p=0.560  | 0.178 (0.02, 1.75)<br>p=0.139 | 0.845 (0.22, 3.21)<br>p=0.805 |
| <b>Average ≥150 min physical activity per week n (%)</b>                                                                   | <b>control</b> | 1523 (84.8%)                  | 1394 (68.9%)                 | 1030 (81.7%)                  | 858 (83.5%)                   | 538 (76.6%)                   | 488 (59.0%)                   | 888 (78.4%)                   | 973 (78.0%)                   | 1056 (75.6%)                  |
|                                                                                                                            | <b>mHealth</b> | 1459 (84.2%)                  | 1413 (68.4%)                 | 980 (85.1%)                   | 806 (80.0%)                   | 601 (74.8%)                   | 485 (58.2%)                   | 899 (74.7%)                   | 1028 (78.4%)                  | 945 (74.6%)                   |

|                                                                                                |                |                                |                                |                                |                                |                                |                                |                                |                                |                                |
|------------------------------------------------------------------------------------------------|----------------|--------------------------------|--------------------------------|--------------------------------|--------------------------------|--------------------------------|--------------------------------|--------------------------------|--------------------------------|--------------------------------|
|                                                                                                | <b>PLA</b>     | 1426 (83.5%)                   | 1385 (67.6%)                   | 966 (80.0%)                    | 796 (79.5%)                    | 578 (78.2%)                    | 471 (58.2%)                    | 1103 (74.5%)                   | 912 (77.0%)                    | 796 (73.8%)                    |
| <b>Average <math>\geq</math>150 min physical activity per week OR (95%CI)</b>                  | <b>control</b> | <b>REF</b>                     | <b>REF</b>                     | <b>REF</b>                     | <b>REF</b>                     | <b>REF</b>                     | <b>REF</b>                     | <b>REF</b>                     | <b>REF</b>                     | <b>REF</b>                     |
|                                                                                                | <b>mHealth</b> | 0.96 (0.60, 1.54)<br>p=0.863   | 1.04 (0.60, 1.81)<br>p=0.897   | 1.23 (1.00, 2.57)<br>p=0.568   | 1.04 (0.49, 2.21)<br>p=0.926   | 0.965 (0.51, 1.77)<br>p=0.884  | 0.97 (0.65, 1.46)<br>p=0.882   | 0.81 (0.50, 1.30)<br>p=0.375   | 1.03 (0.64, 1.65)<br>p=0.903   | 1.10 (0.60, 2.02)<br>p=0.750   |
|                                                                                                | <b>PLA</b>     | 0.91 (0.54, 1.53)<br>p=0.729   | 0.88 (0.52, 1.51)<br>p=0.644   | 0.79 (0.40, 1.56)<br>p=0.506   | 0.79 (0.41, 1.50)<br>p=0.469   | 0.99 (0.55, 1.83)<br>p=0.998   | 0.96 (0.64, 1.43)<br>p=0.824   | 0.74 (0.48, 1.15)<br>p=0.183   | 0.92 (0.57, 1.47)<br>p=0.719   | 0.980 (0.54, 1.76)<br>p=0.945  |
| <b>Mean number of portions of fruit and/or vegetables consumed per day (SD)</b>                | <b>control</b> | 3.80 (1.79)                    | 3.44 (1.47)                    | 3.78 (1.78)                    | 3.35 (1.44)                    | 3.65 (1.66)                    | 3.22 (1.52)                    | 3.85 (1.73)                    | 3.52 (1.59)                    | 3.49 (1.59)                    |
|                                                                                                | <b>mHealth</b> | 3.77 (1.75)                    | 3.12 (1.45)                    | 3.34 (1.76)                    | 3.36 (1.54)                    | 3.75 (1.71)                    | 3.14 (1.47)                    | 3.64 (1.70)                    | 3.46 (1.54)                    | 3.18 (1.62)                    |
|                                                                                                | <b>PLA</b>     | 4.10 (2.16)                    | 3.85 (2.37)                    | 4.14 (2.66)                    | 4.04 (2.80)                    | 3.81 (1.99)                    | 3.39 (1.95)                    | 4.63 (2.62)                    | 3.71 (1.93)                    | 3.33 (1.84)                    |
| <b>Mean number of portions of fruit and/or vegetables consumed per day coefficient (95%CI)</b> | <b>control</b> | <b>REF</b>                     | <b>REF</b>                     | <b>REF</b>                     | <b>REF</b>                     | <b>REF</b>                     | <b>REF</b>                     | <b>REF</b>                     | <b>REF</b>                     | <b>REF</b>                     |
|                                                                                                | <b>mHealth</b> | -0.04 (-0.48, 0.41)<br>p=0.878 | -0.32 (-0.69, 0.06)<br>p=0.100 | -0.48 (-1.06, 0.78)<br>p=0.091 | -0.18 (-0.64, 0.27)<br>p=0.438 | -0.08 (-0.36, 0.53)<br>p=0.712 | -0.23 (-0.50, 0.40)<br>p=0.818 | -0.28 (-0.70, 0.14)<br>p=0.190 | -0.13 (-0.52, 0.26)<br>p=0.509 | -0.16 (-0.52, 0.20)<br>p=0.382 |
|                                                                                                | <b>PLA</b>     | 0.25 (-0.23, 0.72)<br>p=0.307  | 0.42 (-0.15, 0.98)<br>p=0.152  | 0.43 (-0.23, 1.08)<br>p=0.204  | 0.53 (-0.19, 1.25)<br>p=0.151  | 0.28 (-0.22, 0.79)<br>p=0.267  | 0.26 (-0.22, 0.75)<br>p=0.290  | 0.41 (-0.10, 0.93)<br>p=0.113  | 0.21 (-0.24, 0.66)<br>p=0.365  | 0.15 (-0.26, 0.57)<br>p=0.462  |

‡EuroQol-5D (EQ-5D) using UK tariffs

SRQ-20=Self-Reporting Questionnaire 20-Item

PLA=participatory learning and action
